# Supplementary material
Source: PubMed Central journal article supplement (PMC2448393)
Supplement: NIHMS55253-supplement-02.pdf [file NIHMS55253-supplement-02.pdf]

Supplementary Table 1. RT-PCR Primer Sequences

| <b>Gene</b>          | <b>Primer-Probe Sequence 5'-3'</b>                  | <b>Amplicon Size</b> |
|----------------------|-----------------------------------------------------|----------------------|
| E-cadherin           | F: AAGCTTTGGTGTGGGTCAGGG<br>R: CAGGACCAGGAGAAGAGTGC | 265                  |
| N-cadherin           | F: CTGGGACGTATGTGATGACG<br>R: ATGACGTCCACCCTGTTCTC  | 352                  |
| Connexin43           | F: GAACACGGCAAGGTGAAGAT<br>R: GAGCGAGAGACACCAAGGAC  | 247                  |
| NCAM-1               | F: ACGTCCGGTTCATAGTCCTG<br>R: CTATGGGTTCCCCATCCTTT  | 276                  |
| MBP                  | F: CTATAAATCGGCTCACAAGG<br>R: AGGCGGTTATATTAAGAAGC  | 176                  |
| GFAP                 | F: TCCTGGAACAGCAAAACAAG<br>R: CAGCCTCAGGTTGGTTTCAT  | 224                  |
| $\beta$ -Tubulin III | F: TCGTGGAATGGATCCCCAAC<br>R: CTCCATCTCGTCCATGCCCT  | 200                  |
| Oct4                 | F:<br>R:                                            |                      |
| 18S                  | F: ATGACATCAAGAAGGTGGTG<br>R: CATACCAGGAAATGAGCTTG  | 177                  |
