# Supplementary material
Source: PubMed Central journal article supplement (PMC2448393)

Supplementary Figure 2

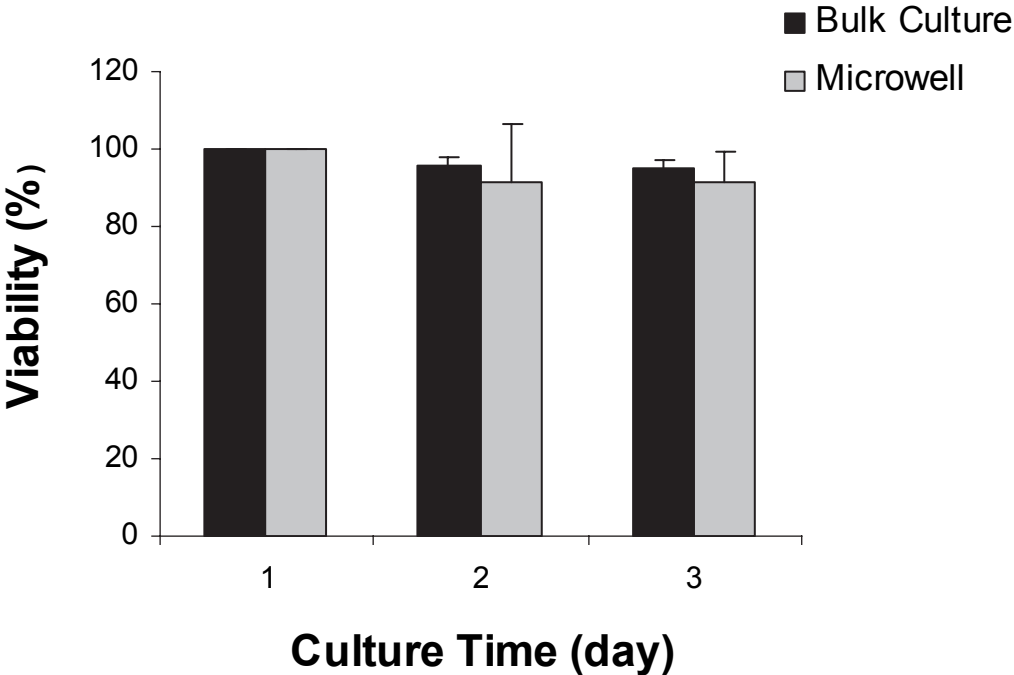

Supplement: NIHMS55253-supplement-01.pdf [file NIHMS55253-supplement-01.pdf]
